# Supplementary material
Source: PubMed Central journal article supplement (PMC5364053)
Supplement: NIHMS840943-supplement-Supp_info.pdf [file NIHMS840943-supplement-Supp_info.pdf]

**Table S1. DNA oligoes used for PCR in this study**

| <b>Name</b> | <b>Sequence (5'-3')</b>                                                                                                         | <b>Used for</b>                       |
|-------------|---------------------------------------------------------------------------------------------------------------------------------|---------------------------------------|
| 1-3F        | gggg- <u>ccg</u> cg (SaclI)-AGGTATTCGTTTGTACTA (nt -600 of <i>FLO11</i> )                                                       | <i>FLO11</i> promoter dissection      |
| 1-3R        | atat- <u>ccc</u> ggg ( <i>Xma</i> I)-AGTGTGCGTATATGGATTTT (nt -1 of <i>FLO11</i> )                                              | <i>FLO11</i> promoter dissection      |
| 6F          | gggg- <u>ccg</u> cg (SaclI)-AATTAAGGTTTTTTTCTTC (nt -1200 of <i>FLO11</i> )                                                     | <i>FLO11</i> promoter dissection      |
| 6R          | aagtaaattattagtaaacaacgaataacct (nt -571 of <i>FLO11</i> )-<br>GTCCATTCTTAGCCCCAAAG (nt -1001 of <i>FLO11</i> )                 | <i>FLO11</i> promoter dissection      |
| 9-10F       | gggg- <u>ccg</u> cg (SaclI)-ATTCTCATCGAGAGCCGAGC (nt -2000 of <i>FLO11</i> )                                                    | <i>FLO11</i> promoter dissection      |
| 9-10R1      | aagtaaattattagtaaacaacgaataacct (nt -571 of <i>FLO11</i> )-<br>GATTAGCGCATTACATTTCG (nt -1601 of <i>FLO11</i> )                 | <i>FLO11</i> promoter dissection      |
| 9-10R2      | ttaagaaaacagaagaaaaaaccttaatt (nt -1171 of <i>FLO11</i> )-<br>GATTAGCGCATTACATTTCG (nt -1601 of <i>FLO11</i> )                  | <i>FLO11</i> promoter dissection      |
| ADH2-F      | CGTTCCAGTCAGGAATGTTCCACGTG (nt -800 of <i>ADH2</i> )                                                                            | <i>ADH2</i> promoter cloning          |
| ADH2-R      | TGTGTATTACGATATAGTTAATAGTTG (nt -1 of <i>ADH2</i> )                                                                             | <i>ADH2</i> promoter cloning          |
| ADH2S-F     | gggg- <u>ccg</u> cg (SaclI)-CGTTCCAGTCAGGAATGTTTC (nt -800 of <i>ADH2</i> )                                                     | For $P_{ADH2}$ - <i>URA3</i> reporter |
| ADH2X-R     | ccat- <u>ccc</u> ggg ( <i>Xma</i> I)-TGTGTATTACGATATAGTTA (nt -1 of <i>ADH2</i> )                                               | For $P_{ADH2}$ - <i>URA3</i>          |
| Flo11ex-F   | GAAAGCTGTGCGGGAAAAC (nt -1650 of <i>FLO11</i> )                                                                                 | Replacing <i>FLO11</i> ORF            |
| Flo11ex-R   | GTATTTTCGTTGTAACCGTAT (nt 350 of <i>FLO11</i> )                                                                                 | Replacing <i>FLO11</i>                |
| FLO11-F     | cccc- <u>gaattc</u> ( <i>Eco</i> RI)-AGTCTTCGTTTCCTATCTCCACATACC (nt -3000 of <i>FLO11</i> )                                    | <i>FLO11</i> promoter amplification   |
| FLo11-R     | atat- <u>ccg</u> cg (SaclI)-AGTGTGCGTATATGGATTTTTGAGGCC (nt -1 of <i>FLO11</i> )                                                | <i>FLO11</i> promoter amplification   |
| FLO11S-F    | gggg- <u>ccg</u> cg (SaclI)-AGTCTTCGTTTCCTATCTCC (nt -3000 of <i>FLO11</i> )                                                    | <i>FLO11</i> promoter dissection      |
| Flo11ura3-R | gtattttcggtgtaaccgtatagttggacggtaccttttgaccagtgac (nt 350 of <i>FLO11</i> )-<br>TAATAACTGATATAATTAATTG (nt 879 of <i>URA3</i> ) | Replacing <i>FLO11</i> ORF            |
| FLO8F       | gcg-tctaga ( <i>Xba</i> I)-ATGAGTTATAAAGTGAATAGT (nt 1 of <i>FLO8</i> )                                                         | PCR-amplifying <i>FLO8</i>            |
| FLO8R       | ccc-cccggg ( <i>Xma</i> I)-A-GCCTTCCCAATTAATAAAAT (nt 2397 of <i>FLO8</i> )                                                     | PCR-amplifying <i>FLO8</i>            |
| HO-F        | CATTTTTGTTTTTTTTGGACAAATGTTG (nt -2000 of <i>HO</i> )                                                                           | <i>HO</i> promoter amplification      |
| HO-R        | TTTAAAGTATAGATAGAATTGATTGCTG (nt -1 of <i>HO</i> )                                                                              | <i>HO</i> promoter amplification      |
| HOS-F       | gggg- <u>ccg</u> cg (SaclI)-CATTTTTGTTTTTTTTGGAC (nt -2000 of <i>HO</i> )                                                       | For $P_{HO}$ - <i>URA3</i> reporter   |
| HOX-R       | ccat- <u>ccc</u> ggg ( <i>Xma</i> I)-TTTAAAGTATAGATAGAATT (nt -1 of <i>HO</i> )                                                 | For $P_{HO}$ - <i>URA3</i> reporter   |
| mCherry-F   | acga- <u>ccc</u> ggg ( <i>Xma</i> I)-GACTAGAGGTGAGCAAGGGC                                                                       | mCherry amplification                 |
| mCherry-R   | cgcg- <u>ctc</u> gag ( <i>Xho</i> I)-CTACTTGTACAGCTCGTC                                                                         | mCherry amplification                 |
| URA3-F      | ATGTCGAAAGCTACATATAAGG (nt 1 of <i>URA3</i> )                                                                                   | <i>URA3</i> ORF amplification         |
| URA3-R      | TTAGTTTTGCTGGCCGCATCTTC (nt 804 of <i>URA3</i> )                                                                                | <i>URA3</i> ORF amplification         |

**Note:** Primers for DNA sequencing are not listed. Capital bases match the template. The lower-case bases are attached sequences with restriction sites underlined. Starting positions (from 5') are indicated in the brackets behind each homologous sequence, with the upstream positions as "-" and the downstream as "+" taking the base A of the start code as 1. In the primer names, "F" and "R" mean forward and reverse, respectively.

**Table S2. Plasmids used in this study**

| Name                      | Marker      | Replicon          | Promoter         | Used for                     | Source                         |
|---------------------------|-------------|-------------------|------------------|------------------------------|--------------------------------|
| <i>p2HGhsp104</i>         | <i>HIS3</i> | <i>2 micron</i>   | <i>GPD</i>       | overexpression of Hsp104     | (Li & Lindquist, 2000)         |
| <i>p413GAL1</i>           | <i>HIS3</i> | <i>CEN6/ARSH4</i> | <i>GAL1</i>      | empty vector                 | ATCC                           |
| <i>p413GAL1-NQYFP</i>     | <i>HIS3</i> | <i>CEN6/ARSH4</i> | <i>GAL1</i>      | expression of Swi1 NQ-YFP    | this study                     |
| <i>p413GAL1-NYFP</i>      | <i>HIS3</i> | <i>CEN6/ARSH4</i> | <i>GAL1</i>      | expression of Swi1 N-YFP     | this study                     |
| <i>p413TEF</i>            | <i>HIS3</i> | <i>CEN6/ARSH4</i> | <i>TEF1</i>      | empty vector                 | ATCC                           |
| <i>p413TEF-NmCherry</i>   | <i>HIS3</i> | <i>CEN6/ARSH4</i> | <i>TEF1</i>      | expression of Swi1 N-mCherry | this study                     |
| <i>p413TEF-NQmCherry</i>  | <i>HIS3</i> | <i>CEN6/ARSH4</i> | <i>TEF1</i>      | Swi1 NQ-mCherry expression   | this study                     |
| <i>p413TEF-NQYFP</i>      | <i>HIS3</i> | <i>CEN6/ARSH4</i> | <i>TEF1</i>      | expression of Swi1 NQ-YFP    | this study                     |
| <i>p413TEF-NYFP</i>       | <i>HIS3</i> | <i>CEN6/ARSH4</i> | <i>TEF1</i>      | expression of Swi1 N-YFP     | this study                     |
| <i>p415ADH2-URA3</i>      | <i>LEU2</i> | <i>CEN6/ARSH4</i> | <i>ADH2</i>      | expression of Ura3           | this study                     |
| <i>p415F1369-URA3</i>     | <i>LEU2</i> | <i>CEN6/ARSH4</i> | <i>F1369</i>     | expression of Ura3           | this study                     |
| <i>p415F136-URA3</i>      | <i>LEU2</i> | <i>CEN6/ARSH4</i> | <i>F136</i>      | expression of Ura3           | this study                     |
| <i>p415F139-URA3</i>      | <i>LEU2</i> | <i>CEN6/ARSH4</i> | <i>F139</i>      | expression of Ura3           | this study                     |
| <i>p415F13-URA3</i>       | <i>LEU2</i> | <i>CEN6/ARSH4</i> | <i>F13</i>       | expression of Ura3           | this study                     |
| <i>p415F16-URA3</i>       | <i>LEU2</i> | <i>CEN6/ARSH4</i> | <i>F16</i>       | expression of Ura3           | this study                     |
| <i>p415F19-URA3</i>       | <i>LEU2</i> | <i>CEN6/ARSH4</i> | <i>F19</i>       | expression of Ura3           | (Du <i>et al.</i> , 2015)      |
| <i>p415FLO11-URA3</i>     | <i>LEU2</i> | <i>CEN6/ARSH4</i> | <i>FLO11</i>     | expression of Ura3           | this study                     |
| <i>p415HO-URA3</i>        | <i>LEU2</i> | <i>CEN6/ARSH4</i> | <i>HO</i>        | expression of Ura3           | this study                     |
| <i>p415SL</i>             | <i>LEU2</i> | <i>CEN6/ARSH4</i> | <i>SUC2-LEU2</i> | empty vector                 | (Du <i>et al.</i> , 2015)      |
| <i>p415SL-URA3</i>        | <i>LEU2</i> | <i>CEN6/ARSH4</i> | <i>SUC2-LEU2</i> | expression of Ura3           | (Du <i>et al.</i> , 2015)      |
| <i>p415TEF</i>            | <i>LEU2</i> | <i>CEN6/ARSH4</i> | <i>TEF1</i>      | empty vector                 | ATCC                           |
| <i>p415TEF-NQYFP</i>      | <i>LEU2</i> | <i>CEN6/ARSH4</i> | <i>TEF1</i>      | expression of Swi1 NQ-YFP    | (Du <i>et al.</i> , 2010)      |
| <i>p416TEF-NQYFP</i>      | <i>URA3</i> | <i>CEN6/ARSH4</i> | <i>TEF1</i>      | expression of Swi1 NQ-YFP    | (Du <i>et al.</i> , 2010)      |
| <i>p416TEF-NYFP</i>       | <i>URA3</i> | <i>CEN6/ARSH4</i> | <i>TEF1</i>      | expression of Swi1 N-YFP     | (Du <i>et al.</i> , 2010)      |
| <i>p416TEF-SWI1YFP</i>    | <i>URA3</i> | <i>CEN6/ARSH4</i> | <i>TEF1</i>      | expression of Swi1-YFP       | (Du <i>et al.</i> , 2008)      |
| <i>p423GAL1</i>           | <i>HIS3</i> | <i>2 micron</i>   | <i>GAL1</i>      | empty vector                 | ATCC                           |
| <i>p423GAL1-NmCherry</i>  | <i>HIS3</i> | <i>2 micron</i>   | <i>GAL1</i>      | expression of Swi1 N-mCherry | this study                     |
| <i>p423GAL1-NQmCherry</i> | <i>HIS3</i> | <i>2 micron</i>   | <i>GAL1</i>      | Swi1 NQ-mCherry expression   | this study                     |
| <i>p423GAL1-NQYFP</i>     | <i>HIS3</i> | <i>2 micron</i>   | <i>GAL1</i>      | expression of Swi1 NQ-YFP    | this study                     |
| <i>p423GAL1-NYFP</i>      | <i>HIS3</i> | <i>2 micron</i>   | <i>GAL1</i>      | expression of Swi1 N-YFP     | this study                     |
| <i>p423GPD</i>            | <i>HIS3</i> | <i>2 micron</i>   | <i>GPD</i>       | empty vector                 | ATCC                           |
| <i>p423GPD-NYFP</i>       | <i>HIS3</i> | <i>2 micron</i>   | <i>GPD</i>       | overexpression of Swi1 N-YFP | this study                     |
| <i>p423GPDSSSE1</i>       | <i>HIS3</i> | <i>2 micron</i>   | <i>GPD</i>       | overexpression of Sse1       | Morano K lab                   |
| <i>p425GPD</i>            | <i>LEU2</i> | <i>2 micron</i>   | <i>GPD</i>       | empty vector                 | ATCC                           |
| <i>p425GPD-HSP104</i>     | <i>LEU2</i> | <i>2 micron</i>   | <i>GPD</i>       | overexpression of Hsp104     | (Park <i>et al.</i> , 2006)    |
| <i>p425GPD-NQYFP</i>      | <i>LEU2</i> | <i>2 micron</i>   | <i>GPD</i>       | Swi1 NQ-YFP overexpression   | this study                     |
| <i>p425GPD-NYFP</i>       | <i>LEU2</i> | <i>2 micron</i>   | <i>GPD</i>       | overexpression of Swi1 N-YFP | this study                     |
| <i>p425GPD-SSE1</i>       | <i>LEU2</i> | <i>2 micron</i>   | <i>GPD</i>       | overexpression of Sse1       | this study                     |
| <i>p425GPD-SWI1YFP</i>    | <i>LEU2</i> | <i>2 micron</i>   | <i>GPD</i>       | overexpression of Swi1-YFP   | this study                     |
| <i>p426GAL1-NQYFP</i>     | <i>URA3</i> | <i>2 micron</i>   | <i>GAL1</i>      | Swi1 NQ-YFP overexpression   | (Du <i>et al.</i> , 2015)      |
| <i>p426GPDSSSE1</i>       | <i>URA3</i> | <i>2 micron</i>   | <i>GPD</i>       | overexpression of Sse1       | Morano K lab                   |
| <i>p426GPD-SWI1</i>       | <i>URA3</i> | <i>2 micron</i>   | <i>GPD</i>       | overexpression of Swi1       | (Du <i>et al.</i> , 2008)      |
| <i>pCUP1-NMGFP</i>        | <i>URA3</i> | <i>CEN6/ARSH4</i> | <i>CUP1</i>      | expressing Sup35 NM-GFP      | (Park <i>et al.</i> , 2006)    |
| <i>pCUP1-RNQ1GFP</i>      | <i>URA3</i> | <i>CEN6/ARSH4</i> | <i>CUP1</i>      | expression of Rnq1-GFP       | (Sondheimer & Lindquist, 2000) |
| <i>pRS303-FLO8</i>        | <i>HIS3</i> |                   | <i>FLO8</i>      | expression of Flo8           | (Du <i>et al.</i> , 2015)      |
| <i>pRS313-FLO8</i>        | <i>HIS3</i> | <i>CEN6/ARSH4</i> | <i>FLO8</i>      | expression of Flo8           | (Du <i>et al.</i> , 2015)      |
| <i>pRS316CUP1-NMCFP</i>   | <i>URA3</i> | <i>CEN6/ARSH4</i> | <i>CUP1</i>      | expression of Sup35 NM-CFP   | (Du & Li, 2014)                |
| <i>pRS413CUP1-NMGFP</i>   | <i>HIS3</i> | <i>CEN6/ARSH4</i> | <i>CUP1</i>      | expressing Sup35 NM-GFP      | Lindquist lab                  |

**Note:** all the listed plasmids contain an ampicillin resistant gene (AMP<sup>R</sup>) for selection in *E. coli*

**Table S3. Yeast strains used in this study**

| Name  | Background | Description                                                                                                 | Source                          |
|-------|------------|-------------------------------------------------------------------------------------------------------------|---------------------------------|
| LY422 | 74D-694    | MATa <i>ade1-14 trp1-289 his3-200 ura3-52 leu2-3, 112</i>                                                   | (Chernoff <i>et al.</i> , 1995) |
| LY421 | 74D-694    | MATa <i>ade1-14 trp1-289 his3-200 ura3-52 leu2-3, 112 [PIN<sup>+</sup>]</i>                                 | (Chernoff <i>et al.</i> , 1995) |
| LY420 | 74D-694    | MATa <i>ade1-14 trp1-289 his3-200 ura3-52 leu2-3, 112 [PSI<sup>+</sup>][PIN<sup>+</sup>]</i>                | (Chernoff <i>et al.</i> , 1995) |
| DY902 | 74D-694    | MATa <i>ade1-14 trp1-289::TRP1::P<sub>TEF1</sub>-RNQ1CFP his3-200 ura3-52 leu2-3, 112 [SWI<sup>+</sup>]</i> | (Crow <i>et al.</i> , 2011)     |
| DY362 | 74D-694    | MATa <i>ade1-14 trp1-289 his3-200 ura3-52 leu2-3, 112 [PSI<sup>+</sup>]</i>                                 | (Du & Li, 2014)                 |
| LY722 | 74D-694    | MATa <i>ade1-14 trp1-289 his3-200 ura3-52 leu2-3, 112 [SWI<sup>+</sup>]</i>                                 | (Du & Li, 2014)                 |
| DY587 | 74D-694    | MATa <i>ade1-14 trp1-289 his3-200 ura3-52 leu2-3, 112 [SWI<sup>+</sup>][PSI<sup>+</sup>]</i>                | (Du & Li, 2014)                 |
| LY746 | BY4741     | MATa <i>his3Δ1 leu2Δ0 met15Δ0 ura3Δ0 flo8 [PIN<sup>+</sup>]</i>                                             | ATCC                            |
| DY902 | BY4741     | MATa <i>his3Δ1 leu2Δ0 met15Δ0 ura3Δ0 flo8</i>                                                               | this study                      |
| LY720 | BY4741     | MATa <i>his3Δ1 leu2Δ0 met15Δ0 ura3Δ0 flo8 swi1Δ::KanMX4</i>                                                 | (Du <i>et al.</i> , 2008)       |
| LY742 | BY4741     | MATa <i>his3Δ1 leu2Δ0 met15Δ0 ura3Δ0 flo8 [SWI<sup>+</sup>]</i>                                             | (Du <i>et al.</i> , 2008)       |
| DY767 | BY4741     | MATa <i>his3Δ1 leu2Δ0 met15Δ0 ura3Δ0 flo8 flo11Δ::P<sub>F139</sub>-URA3</i>                                 | this study                      |
| LY740 | BY4741     | MATa <i>his3Δ1 leu2Δ0 met15Δ0 ura3Δ0 flo8 flo11Δ::P<sub>F139</sub>-URA3 [SWI<sup>+</sup>]</i>               | this study                      |
| LY741 | BY4741     | MATa <i>his3Δ1 leu2Δ0 met15Δ0 ura3Δ0 flo8::FLO8::HIS3 [SWI<sup>+</sup>]</i>                                 | (Du <i>et al.</i> , 2015)       |
| DY759 | BY4741     | MATa <i>his3Δ1 leu2Δ0 met15Δ0 ura3Δ0 flo8::FLO8::HIS3 flo11Δ::P<sub>F139</sub>-URA3</i>                     | this study                      |
| LY744 | BY4741     | MATa <i>his3Δ1 leu2Δ0 met15Δ0 ura3Δ0 flo8::FLO8::HIS3 flo11Δ::P<sub>F139</sub>-URA3 [SWI<sup>+</sup>]</i>   | this study                      |
| LY737 | BY4741     | MATa <i>his3Δ1 leu2Δ0 met15Δ0 ura3Δ0 flo8::FLO8::HIS3 flo11Δ::P<sub>FLO11</sub>-URA3 [SWI<sup>+</sup>]</i>  | (Du <i>et al.</i> , 2015)       |
| DY758 | BY4741     | MATa <i>his3Δ1 leu2Δ0 met15Δ0 ura3Δ0 flo8::FLO8::HIS3 flo11Δ::P<sub>FLO11</sub>-URA3</i>                    | (Du <i>et al.</i> , 2015)       |
| DY755 | BY4741     | MATa <i>his3Δ1 leu2Δ0 met15Δ0 ura3Δ0 flo8::FLO8::HIS3 flo1Δ::P<sub>FLO1</sub>-URA3</i>                      | (Du <i>et al.</i> , 2015)       |
| LY735 | BY4741     | MATa <i>his3Δ1 leu2Δ0 met15Δ0 ura3Δ0 flo8::FLO8::HIS3 flo1Δ::P<sub>FLO1</sub>-URA3 [SWI<sup>+</sup>]</i>    | (Du <i>et al.</i> , 2015)       |
| DY761 | BY4741     | MATa <i>his3Δ1 leu2Δ0 met15Δ0 ura3Δ0 flo8::FLO8::HIS3 swi1Δ::KanMX4</i>                                     | (Du <i>et al.</i> , 2015)       |
| LY278 | CY396      | MATa <i>alpha swi12::HIS3::SWI2-HA-6xhis::URA3 HO-lacZ</i>                                                  | Lindquist Lab                   |

## Reference

- Chernoff, Y.O., S.L. Lindquist, B. Ono, S.G. Inge-Vechtomov & S.W. Liebman, (1995) Role of the chaperone protein Hsp104 in propagation of the yeast prion-like factor [PSI<sup>+</sup>]. *Science* **268**: 880-884.
- Crow, E.T., Z. Du & L. Li, (2011) A small, glutamine-free domain propagates the [SWI<sup>+</sup>] prion in budding yeast. *Molecular and cellular biology*.
- Du, Z., E.T. Crow, H.S. Kang & L. Li, (2010) Distinct subregions of Swi1 manifest striking differences in prion transmission and SWI/SNF function. *Molecular and cellular biology* **30**: 4644-4655.
- Du, Z. & L. Li, (2014) Investigating the interactions of yeast prions: [SWI<sup>+</sup>], [PSI<sup>+</sup>], and [PIN<sup>+</sup>]. *Genetics* **197**: 685-700.
- Du, Z., K.W. Park, H. Yu, Q. Fan & L. Li, (2008) Newly identified prion linked to the chromatin-remodeling factor Swi1 in *Saccharomyces cerevisiae*. *Nat Genet* **40**: 460-465.
- Du, Z., Y. Zhang & L. Li, (2015) The Yeast Prion [SWI(+)] Abolishes Multicellular Growth by Triggering Conformational Changes of Multiple Regulators Required for Flocculin Gene Expression. *Cell reports* **13**: 2865-2878.
- Li, L. & S. Lindquist, (2000) Creating a protein-based element of inheritance. *Science* **287**: 661-664.
- Park, K.W., J.S. Hahn, Q. Fan, D.J. Thiele & L. Li, (2006) De Novo Appearance and "Strain" Formation of Yeast Prion [PSI<sup>+</sup>] Are Regulated by the Heat-Shock Transcription Factor. *Genetics* **173**: 35-47.
- Sondheimer, N. & S. Lindquist, (2000) Rnq1: an epigenetic modifier of protein function in yeast. *Molecular cell* **5**: 163-172.

**Figure S1**

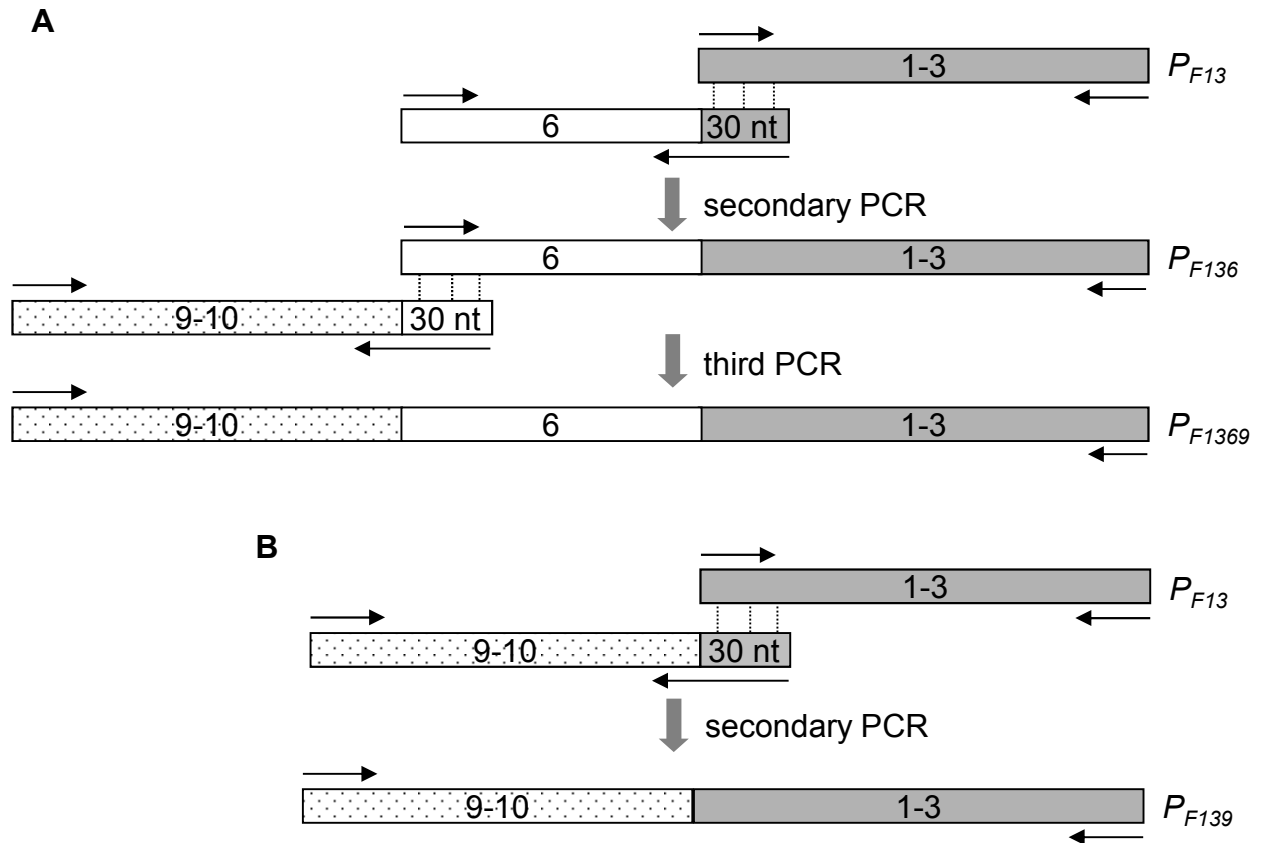

**Figure S1.** Programmatic illustration of the strategies to create truncated *FLO11* promoters. A bridge-PCR was used to generate  $P_{F136}$  and  $P_{F1369}$  (**A**), and  $P_{F139}$  (**B**). Arrows represent primers used in PCRs. The *FLO11* gene promoter spans a 3-kb upstream sequence that can be divided into 15 0.2-kb sub-regions. The sub-regions of 1-3, 6, and 9-10 include major upstream activation sites (UASs) (also see Figure 1A for details).

**Figure S2**

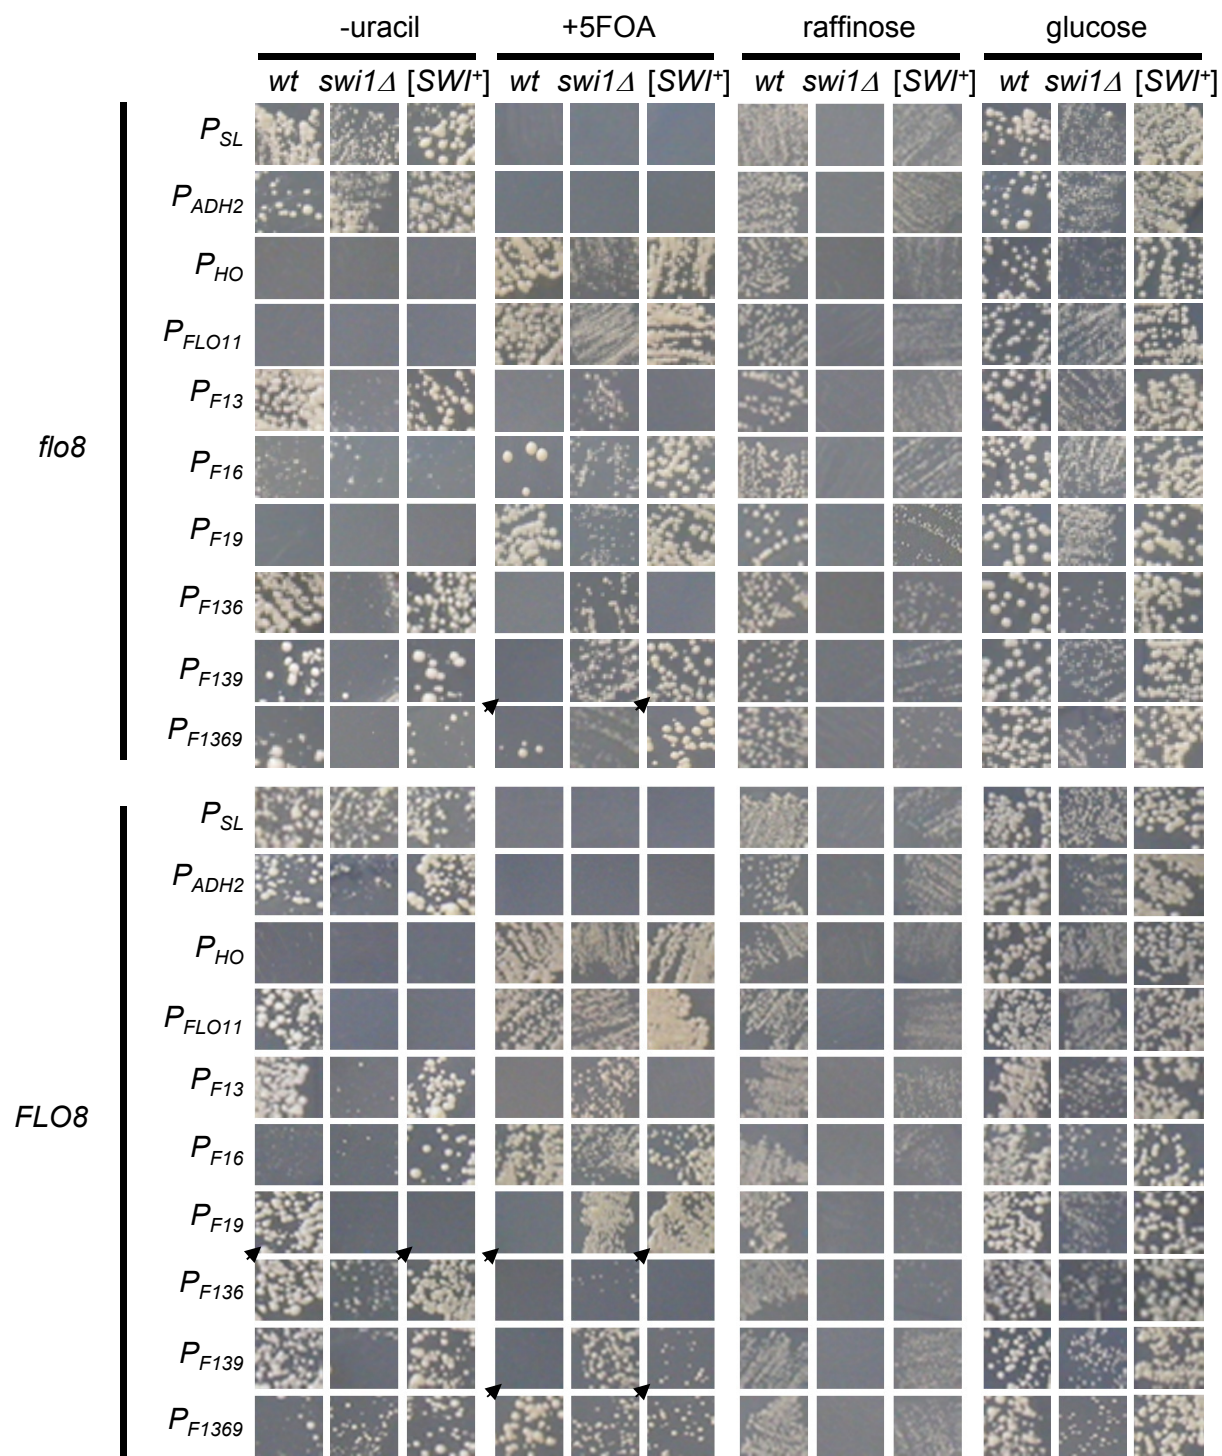

**Figure S2.** Growth of *flo8* (upper) and *FLO8*-repaired (lower) BY4741 strains with the indicated Swi1 prion states on synthetic complete (SC) plates without uracil (-uracil), with 5 FOA (+5FOA), non-selective SC with raffinose as the sole carbon source (raffinose) or with glucose (glucose). As indicated, all cells carry a *CEN*-plasmid expressing *URA3* gene driven by promoters of *SUC2-LEU2* ( $P_{SL}$ ), *ADH2*, *HO*, or *FLO11* (wild-type and engineered). Arrowheads highlight the distinguishable growths of wild-type [*swi*<sup>-</sup>] and [*SWI*<sup>+</sup>] strains under the tested conditions.

**Figure S3**

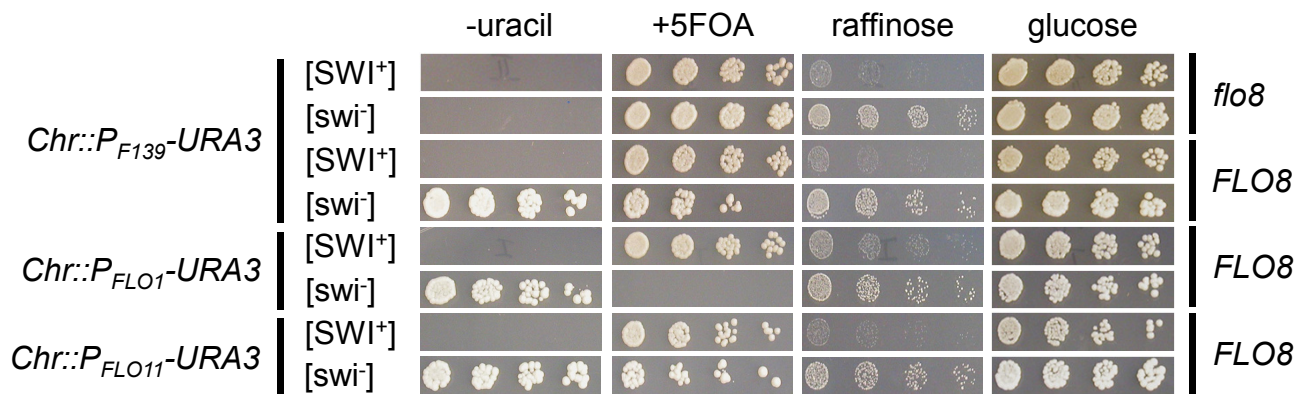

**Figure S3.** As described in Experimental Procedures, the indicated cassettes containing *URA3* gene driven by wild-type (*Chr::P<sub>FLO11</sub>-URA3*) or engineered (*Chr::P<sub>F139</sub>-URA3*) *FLO11* promoter, or wild-type *FLO1* promoter (*Chr::P<sub>FLO1</sub>-URA3*) were used to replace the *FLO11*- or *FLO1*-ORF including the putative promoter regions at their corresponding chromosomal loci in isogenic [SWI<sup>+</sup>] and [swi<sup>-</sup>] cells with (*FLO8*) or without (*flo8*) repairing *FLO8*, respectively. Mid-log phase cultures of these strains were properly diluted and spotted for growth assays on glucose-containing SC selective medium (glucose), without uracil (-uracil), or with 5-FOA (+5FOA). Raffinose plate was also used to verify the Swi1 status. Shown are representative images of at least three independent experiments, which were taken 3 days post spotting onto the indicated plates.

**Figure S4**

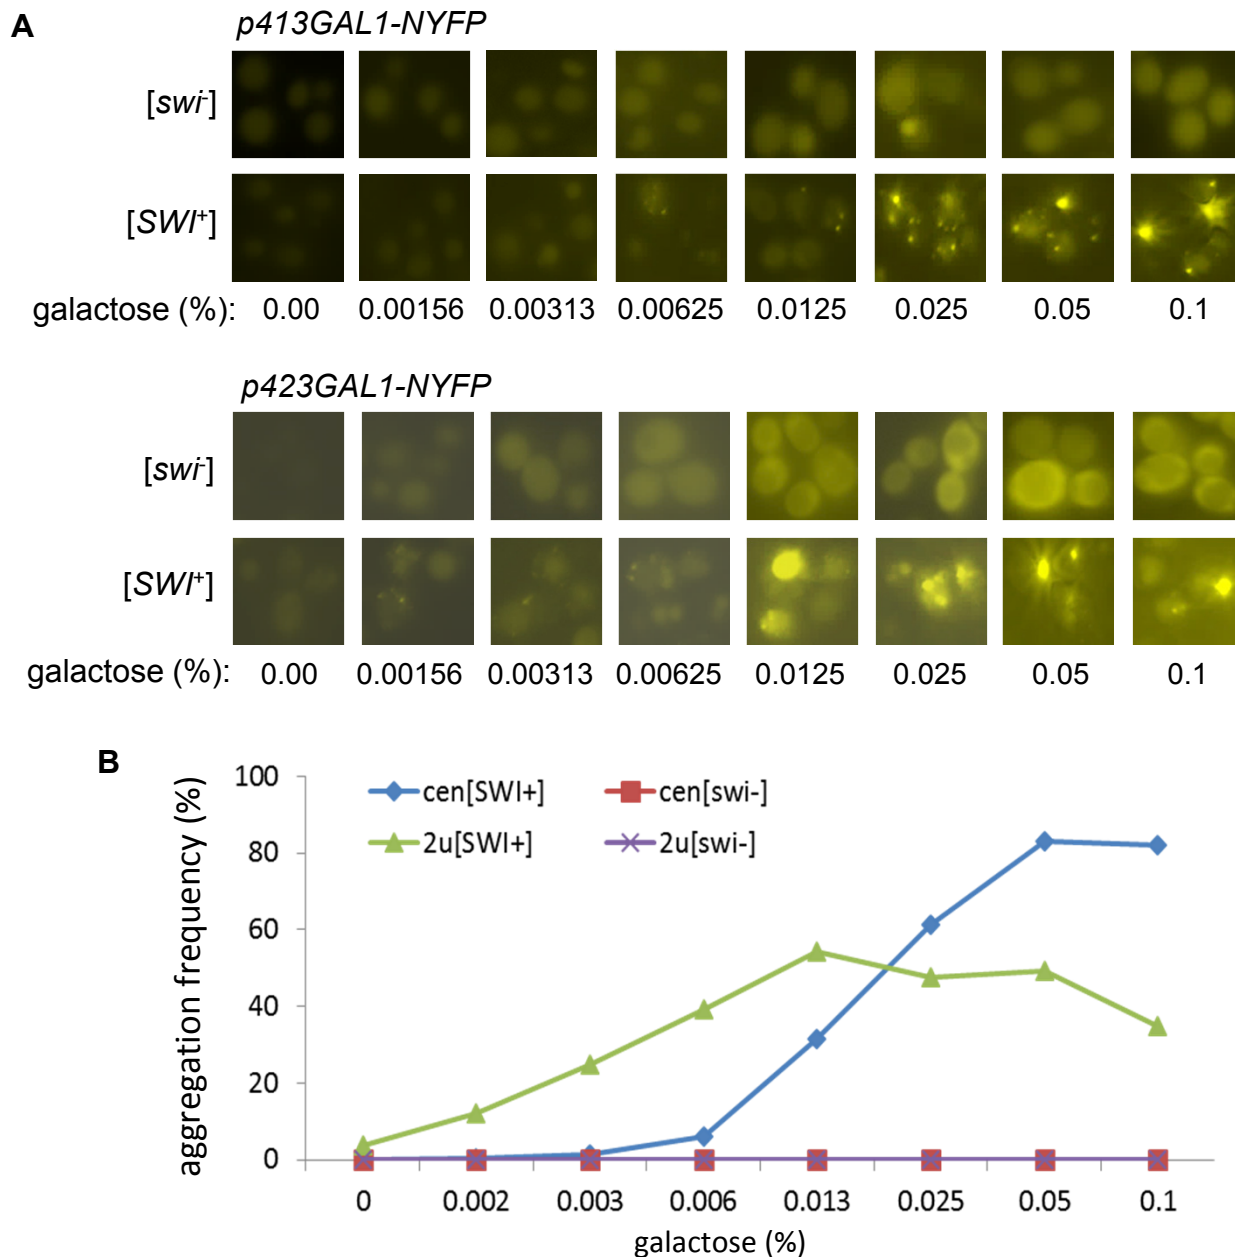

**Figure S4.** Determination of the minimal galactose concentration in a *GAL1*-driven *SWI1 N-YFP* expression experiment that can effectively distinguish the aggregation status of [*swi*<sup>-</sup>] and [*SWI*<sup>+</sup>] cells. **(A)** Isogenic 74D-694 [*swi*<sup>-</sup>] and [*SWI*<sup>+</sup>] strains carrying plasmid *p413GAL1-NYFP* (upper) or *p423GAL1-NYFP* (lower) were streaked to SC-his plates containing the indicated amount of galactose. N-YFP aggregation was assayed by fluorescence microscopy after three days of growth. **(B)** Cells containing N-YFP aggregates in (A) were quantified.

**Figure S5**

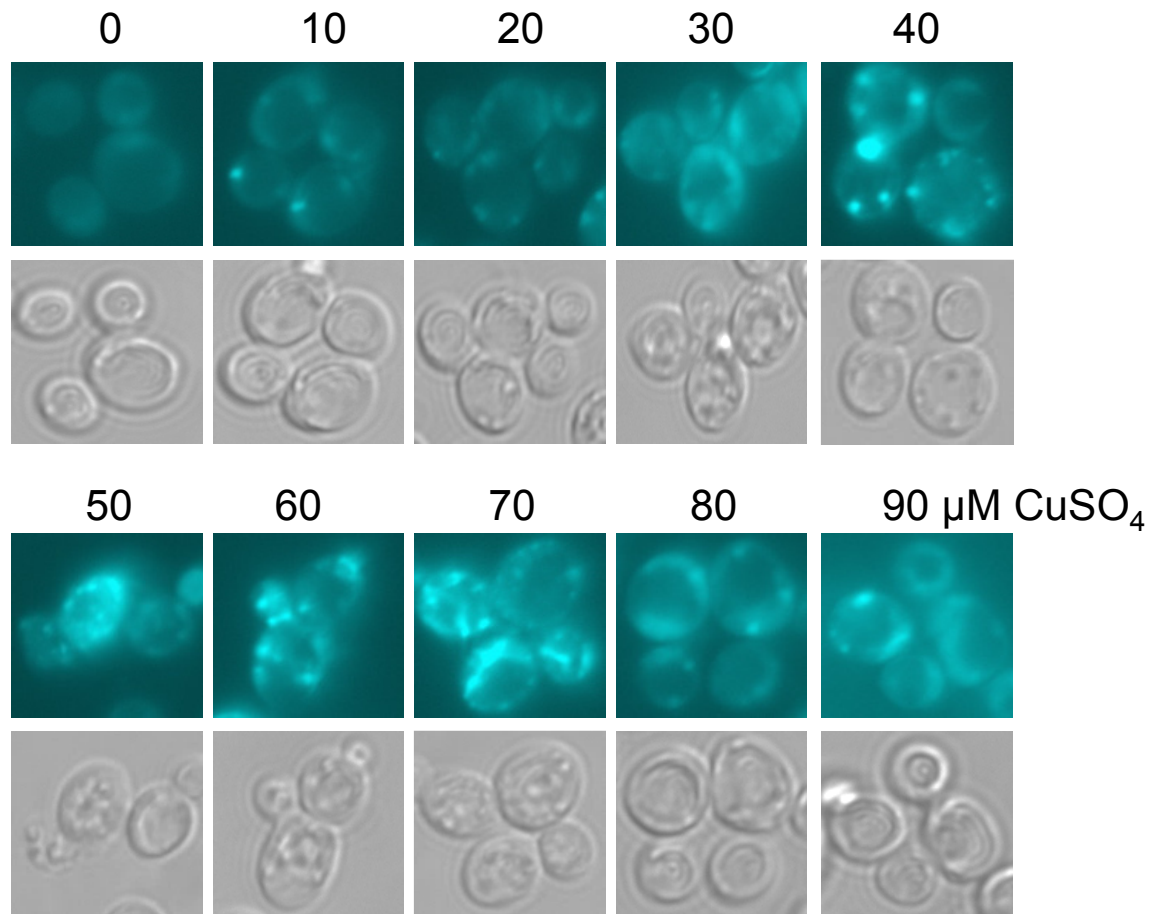

74D-694 ( $[PSI^+][PIN^+]$ ): *p316CUP1-NMCFP*

**Figure S5.** Determination of the minimal amount of the *CUP1* promoter inducer ( $\text{CuSO}_4$ ) that can be used to visualize Sup35 NM-CFP aggregates in a  $[PSI^+][PIN^+]$  74D-694 strain. Overnight SC-ura culture of the strain containing plasmid *p316CUP1-NMCFP* was diluted into the same medium to  $\sim 10^6$  cells/mL and grown for 3 h before adding the indicated amounts of  $\text{CuSO}_4$ . The NM-CFP aggregation was observed after overnight (24 h) of induction.
